# Supplementary material
Source: PubMed Central journal article supplement (PMC5565446)
Supplement: pnas.1705780114.sd03.pdf [file pnas.1705780114.sd03.pdf]

# Dataset S3

Editing analysis of *dyw2-2* and *nuwa-1* by Sanger sequencing of targeted RT-PCR products.

## LEGEND

Chromosome and transcript name

Mitochondria: *nad4*

Editing site

Mutant Sanger sequencing chromatogram

DEE of the corresponding editing site for the primary allele based on the RNA-seq data. Only statistically significant values are shown.

RNAseq

-25%    -74%

Control Sanger sequencing chromatogram

Genomic position of the editing site

168095    168128-9    168141

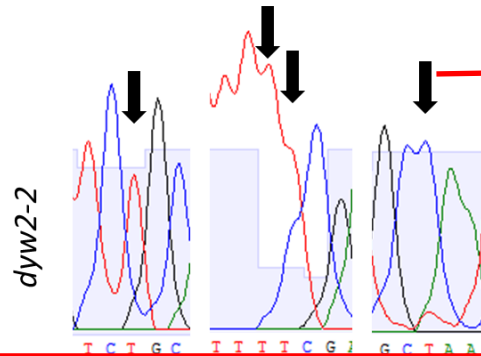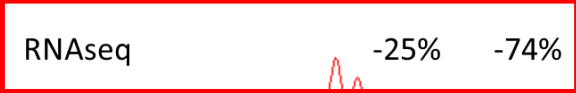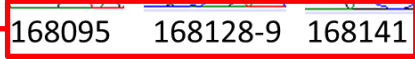

# *dyw2-2*

4 chloroplastic editing sites  
57 mitochondrial editing sites

# Chloroplast

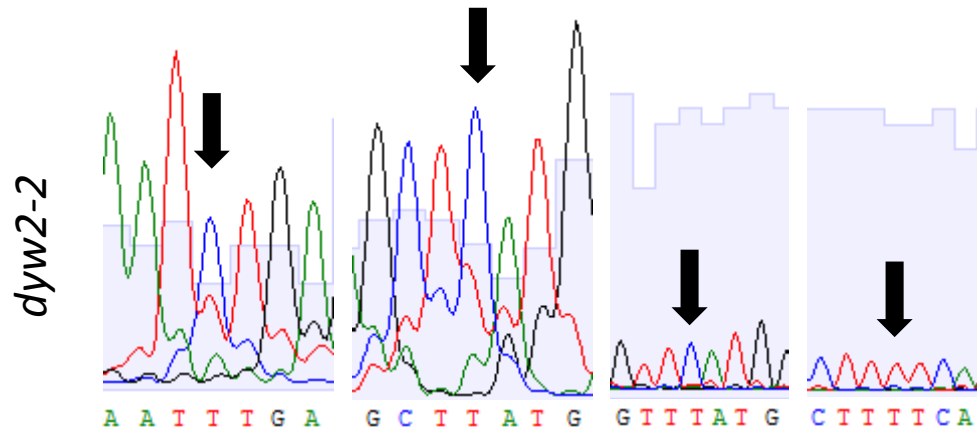

RNAseq

-99%

-97%

-98%

CT

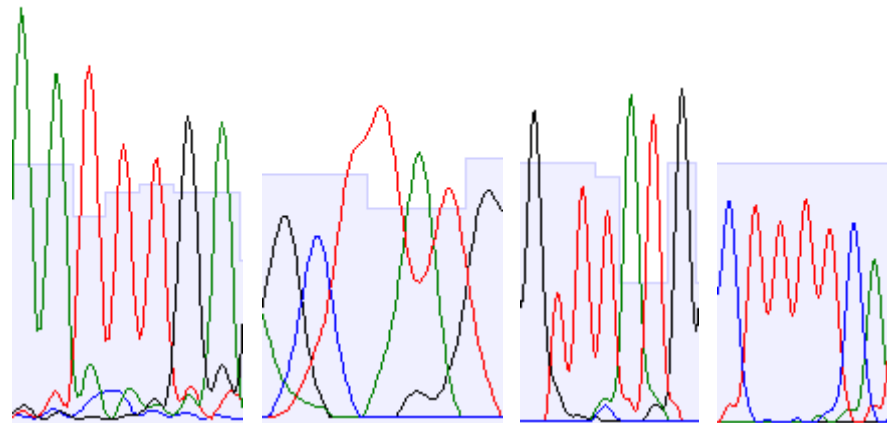

78691  
*rpoA*

69942  
*clpP*

96579  
*ndhB*

96419  
*ndhB*

Mitochondria : *nad1*

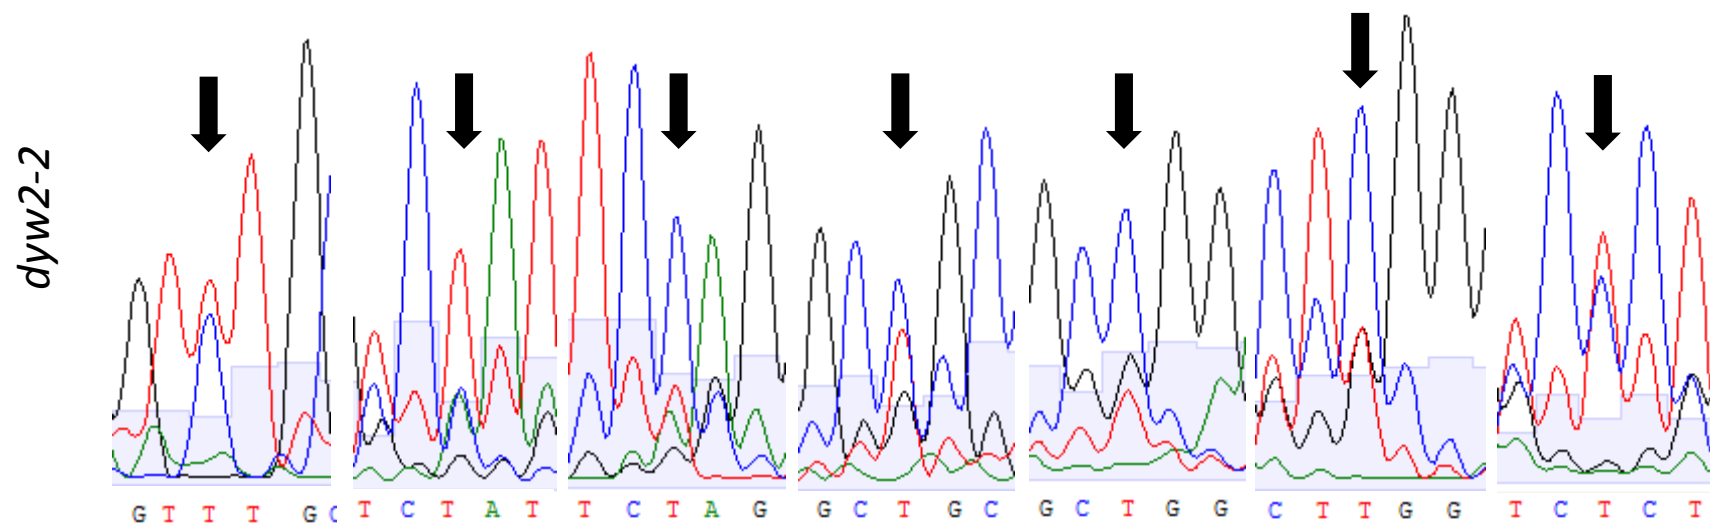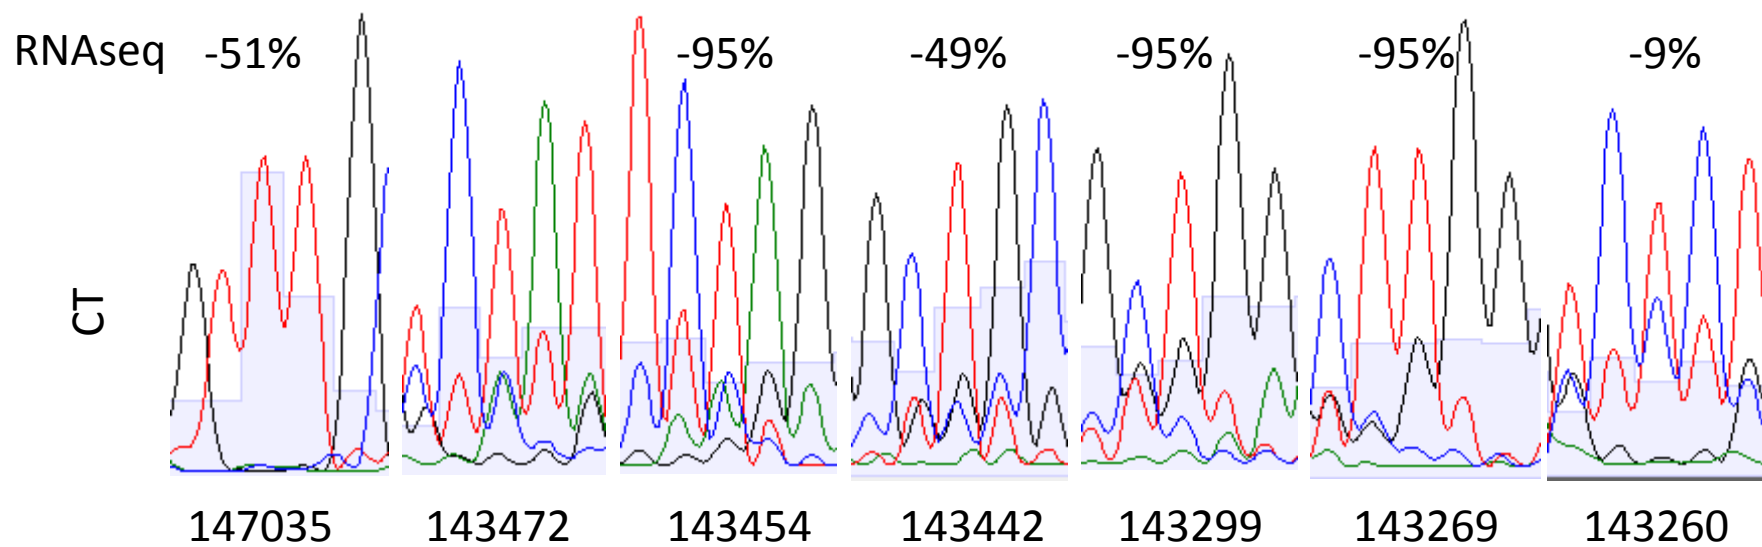

Mitochondria: *nad4*

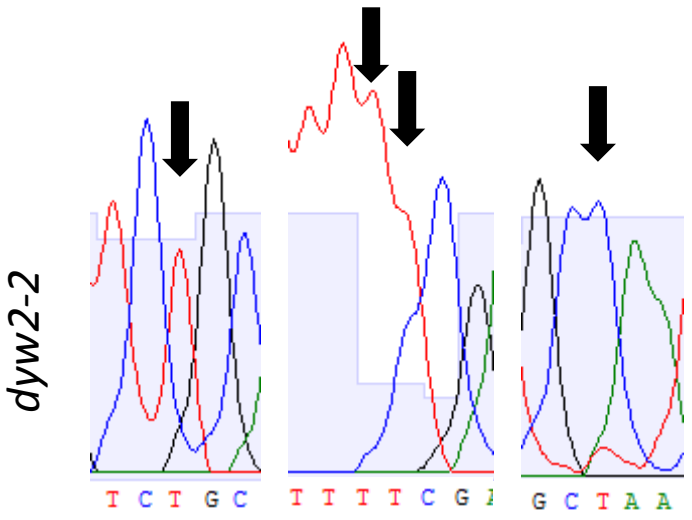

RNAseq

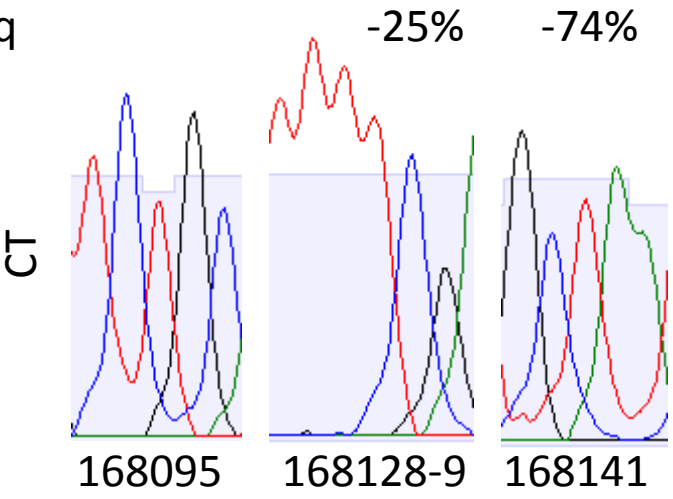

Mitochondria: *ccmB*

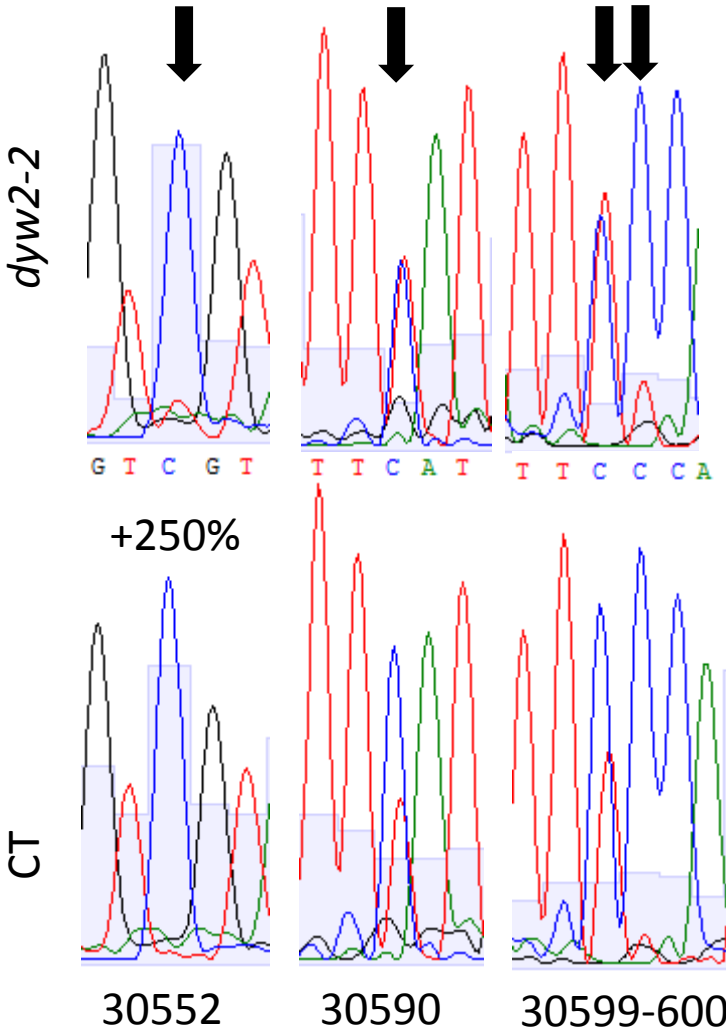

Mitochondria: *cmbB*

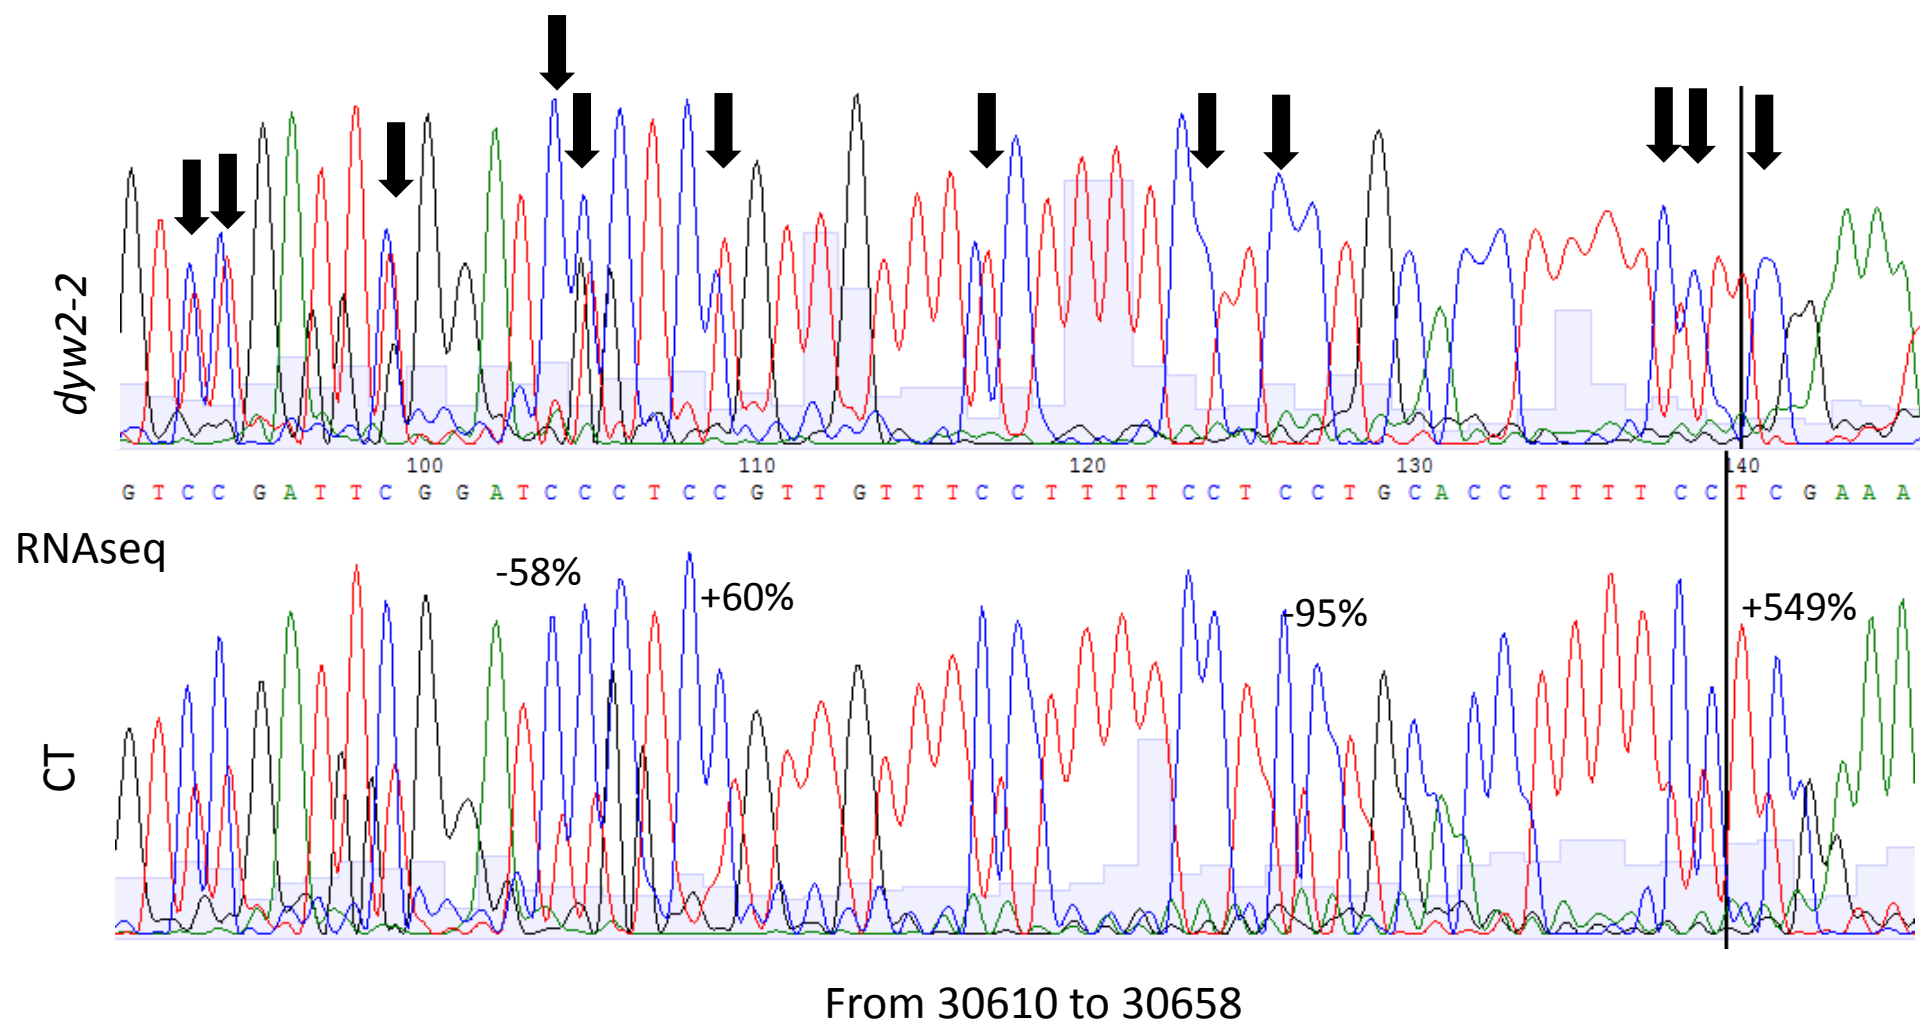

Mitochondria: *atp4*

*dyw2-2*

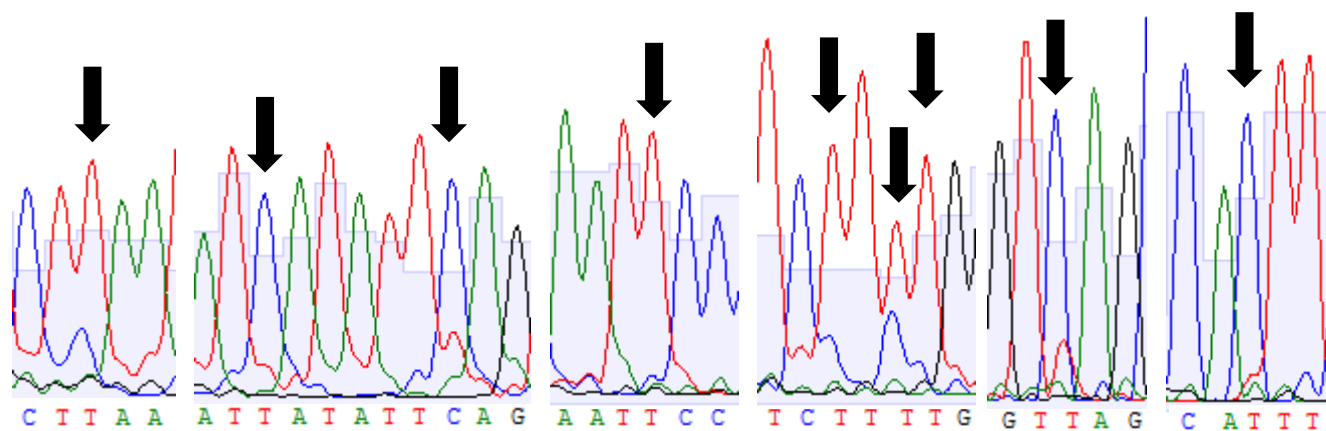

RNAseq

CT

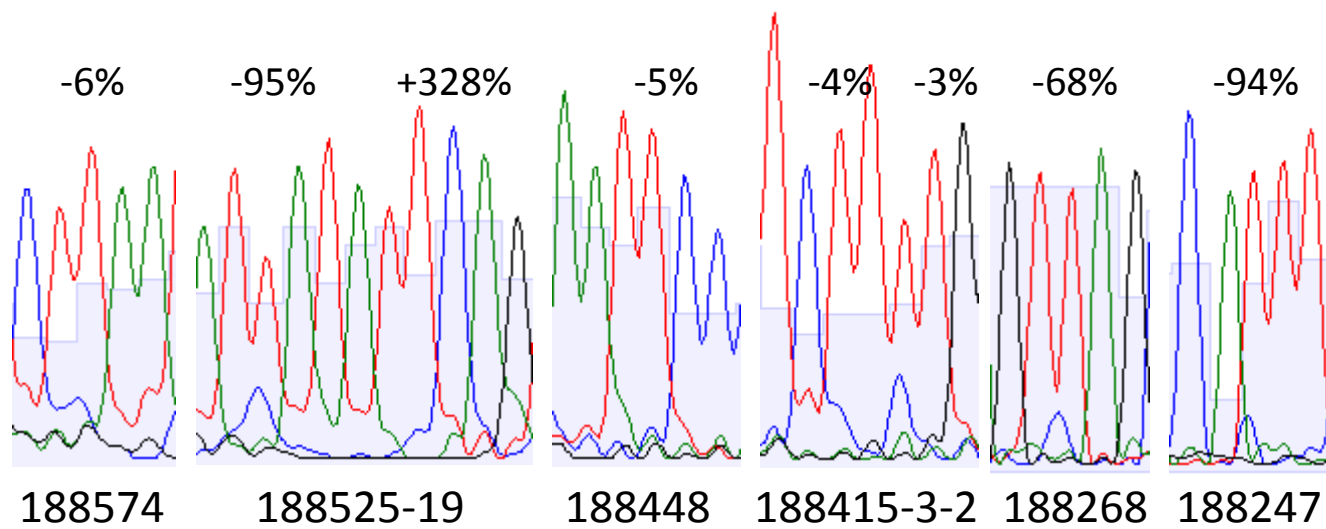



Mitochondria: *nad5*

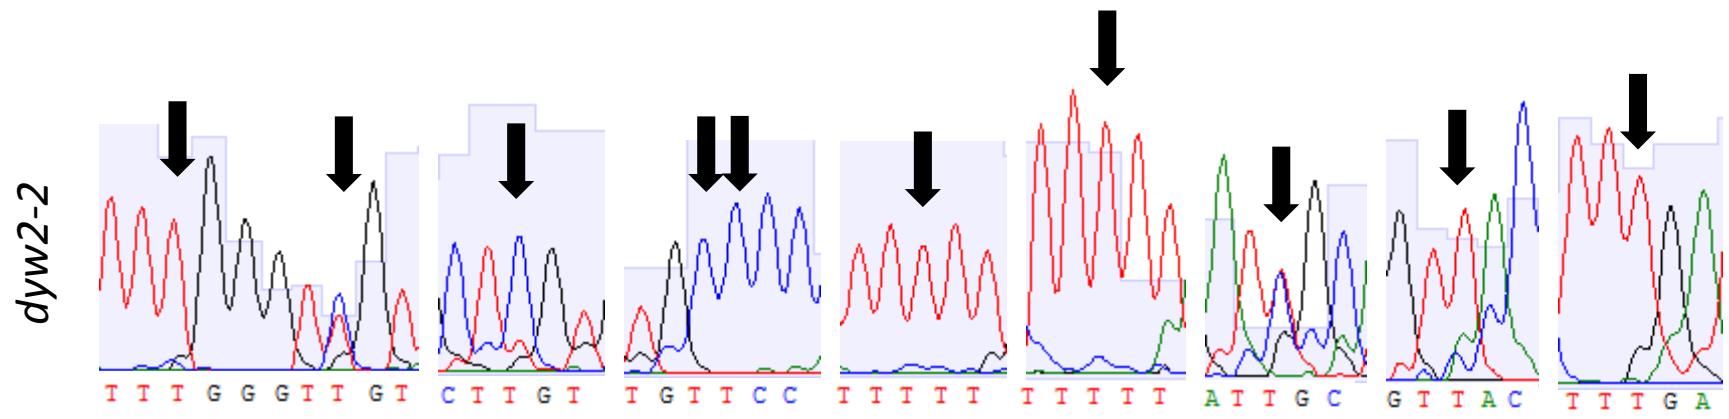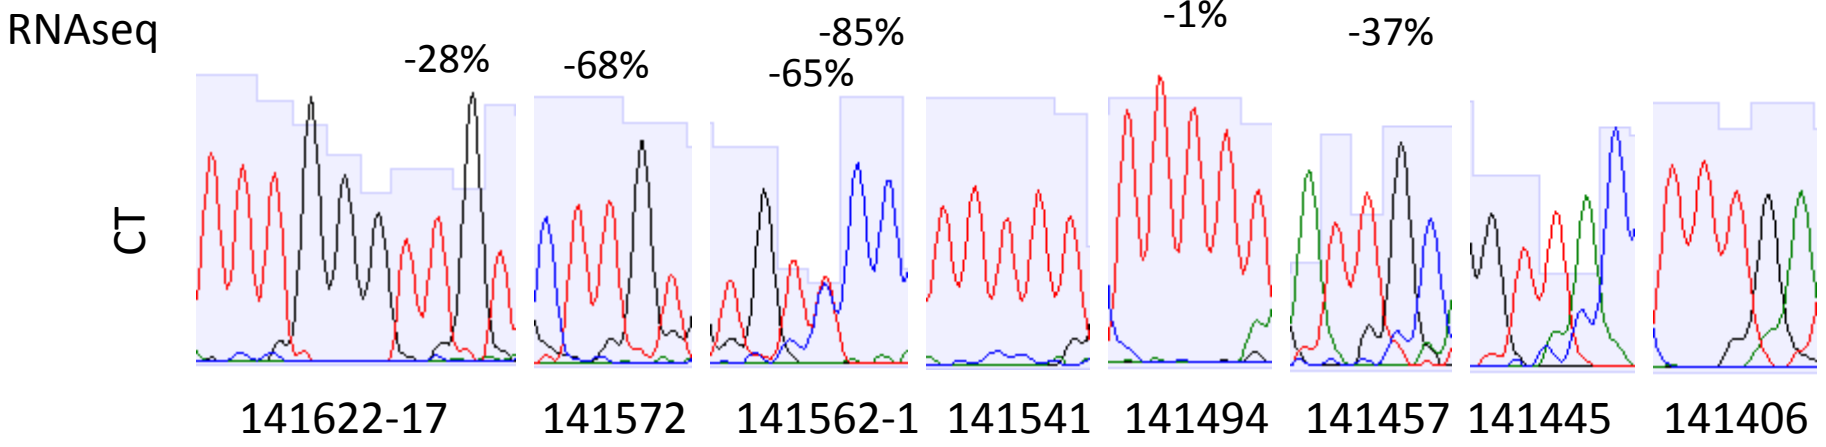

Mitochondria: *nad5*

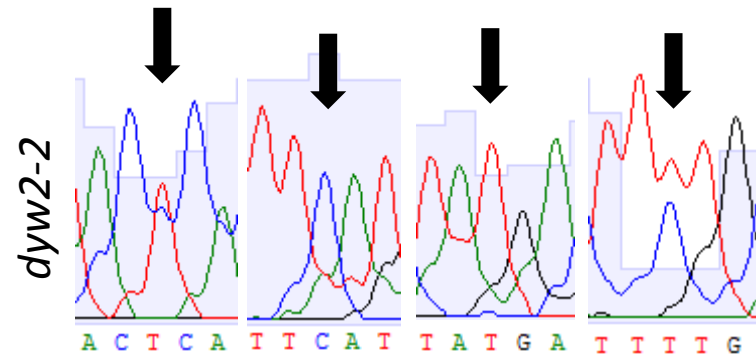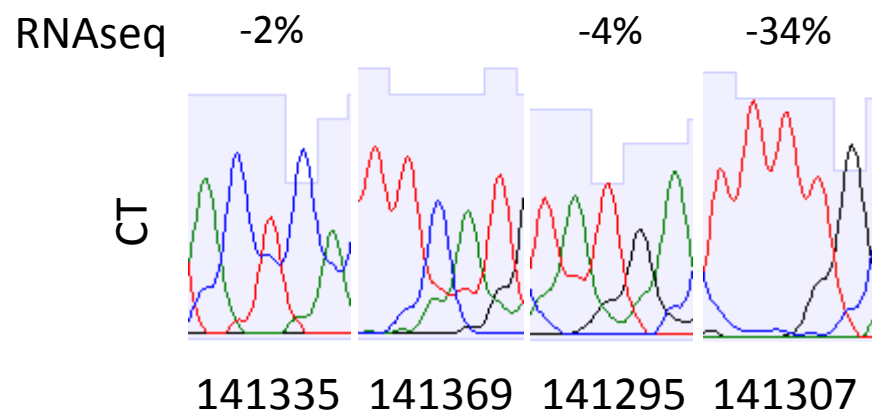

Mitochondria: *rps4*

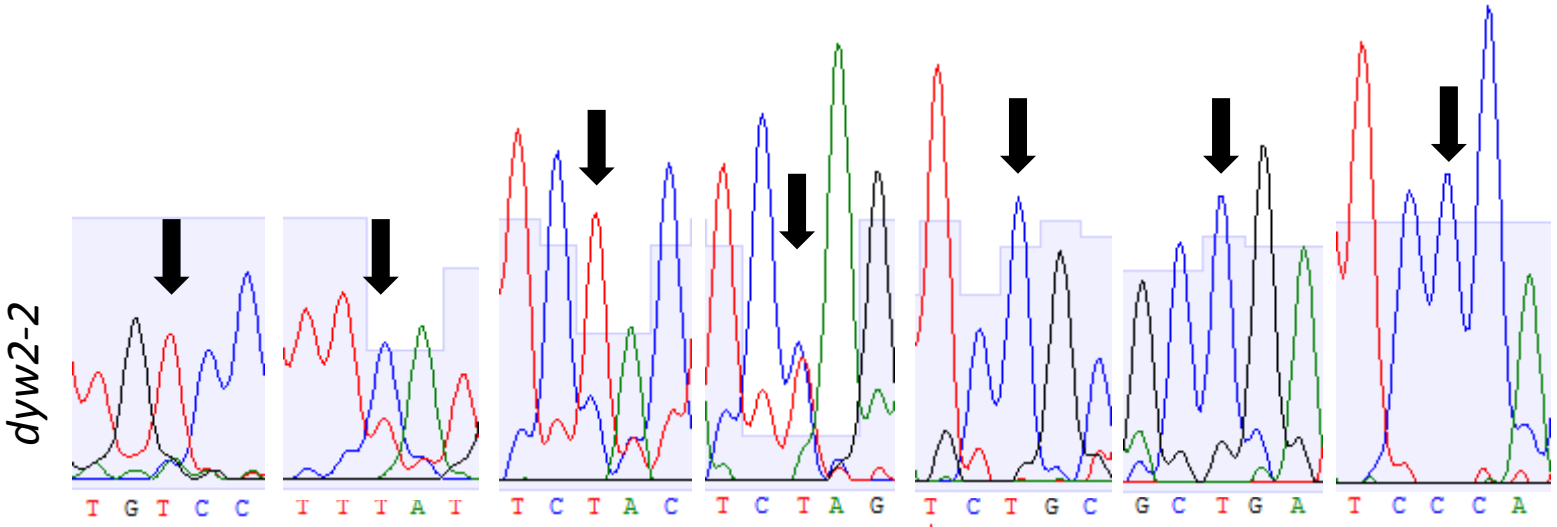

RNAseq

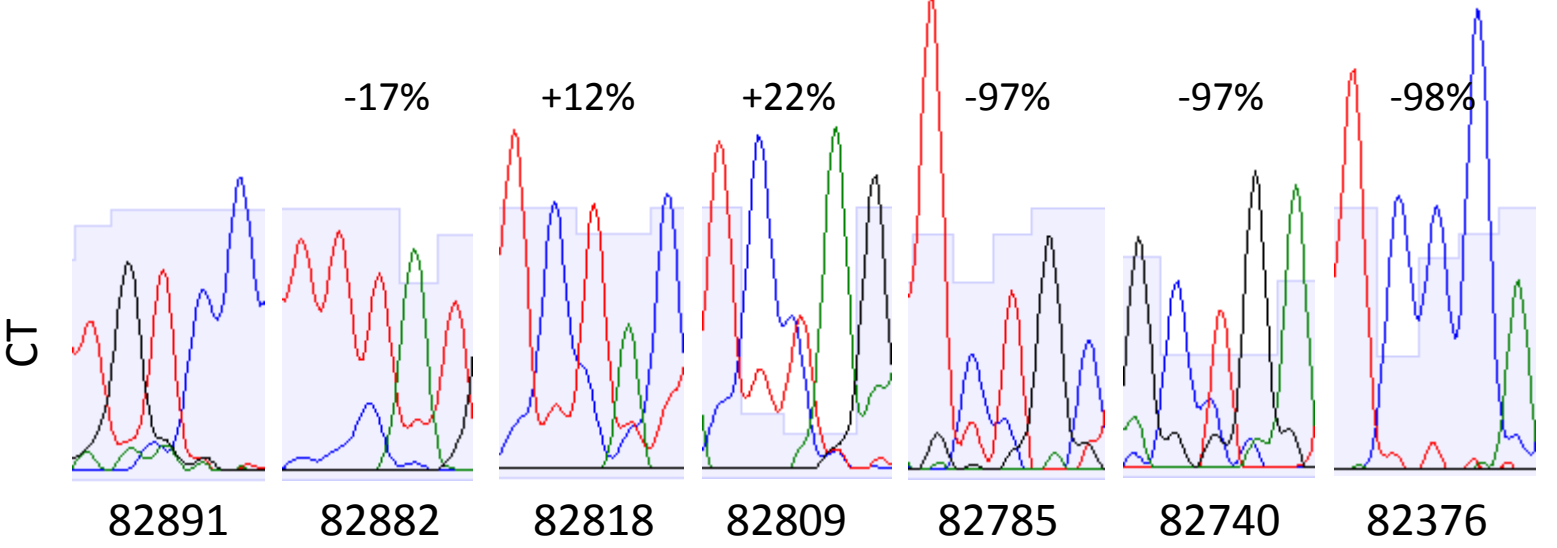

# *nuwa-1*

4 chloroplastic editing sites  
68 mitochondrial editing sites

# Chloroplast

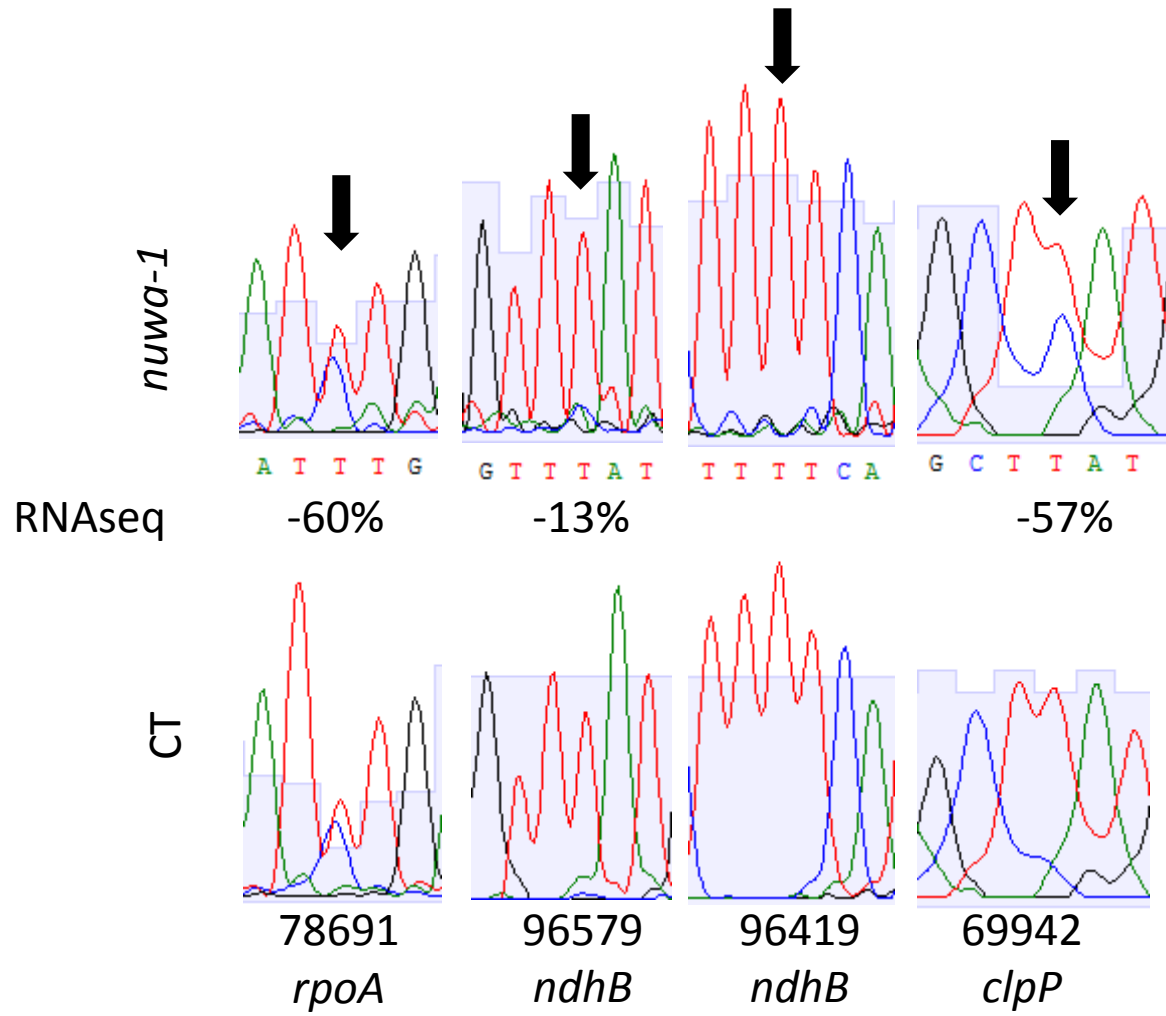

Mitochondria : *nad1*

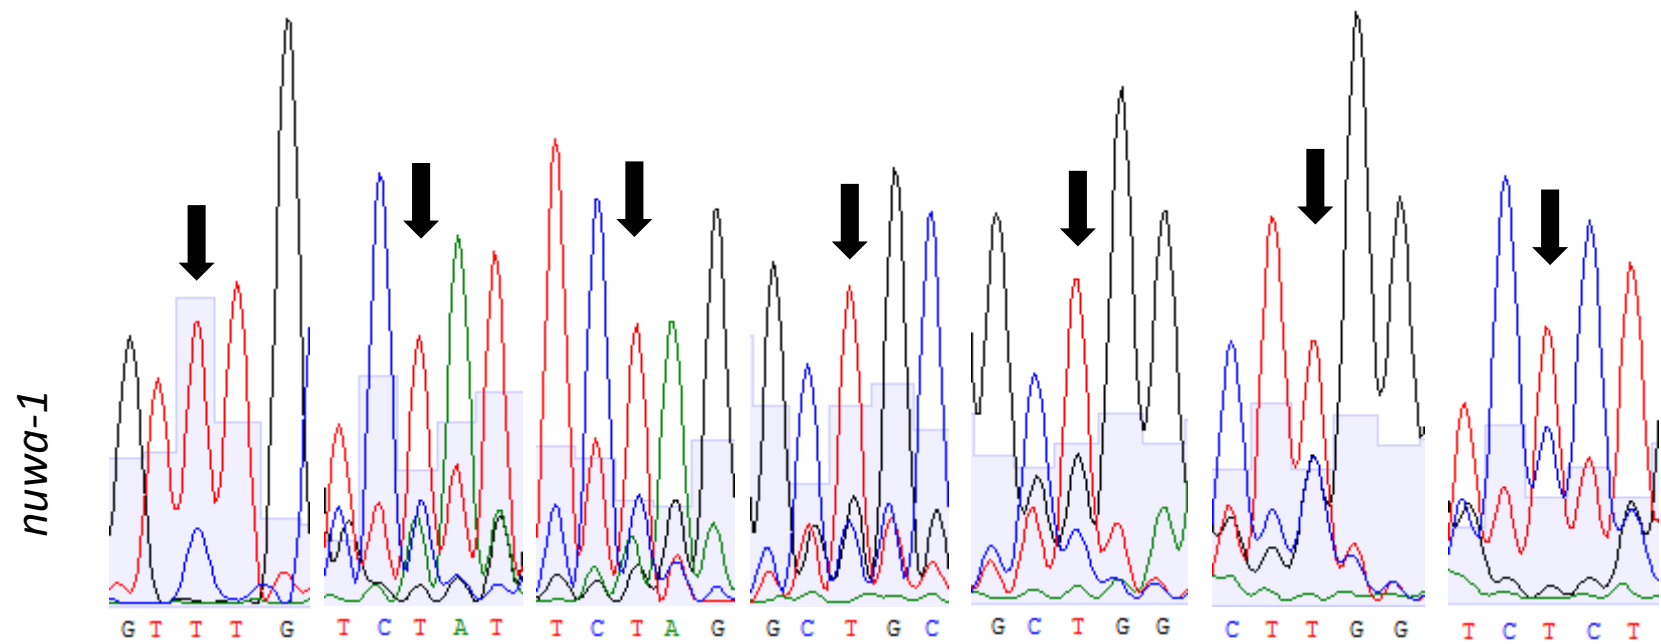

RNAseq -3%

-19%

-27%

-5%

-20%

CT

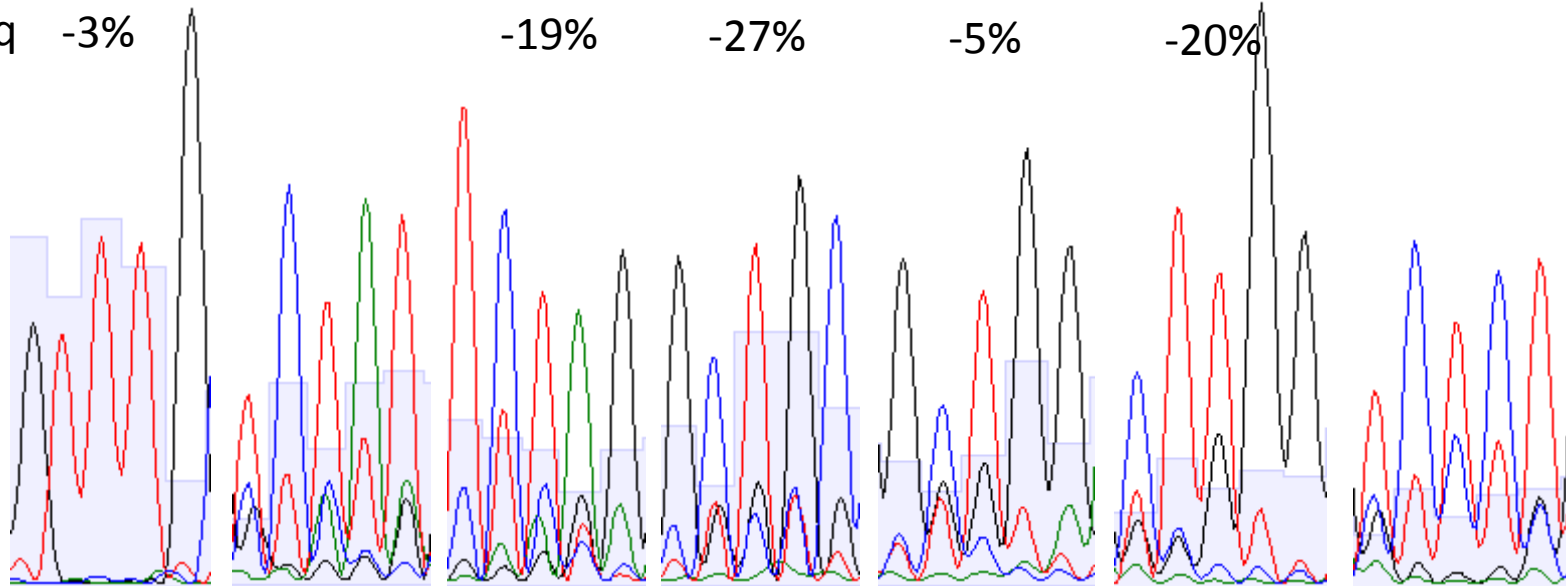

147035

143472

143454

143442

143299

143269

143260

Mitochondria : *ccmB*

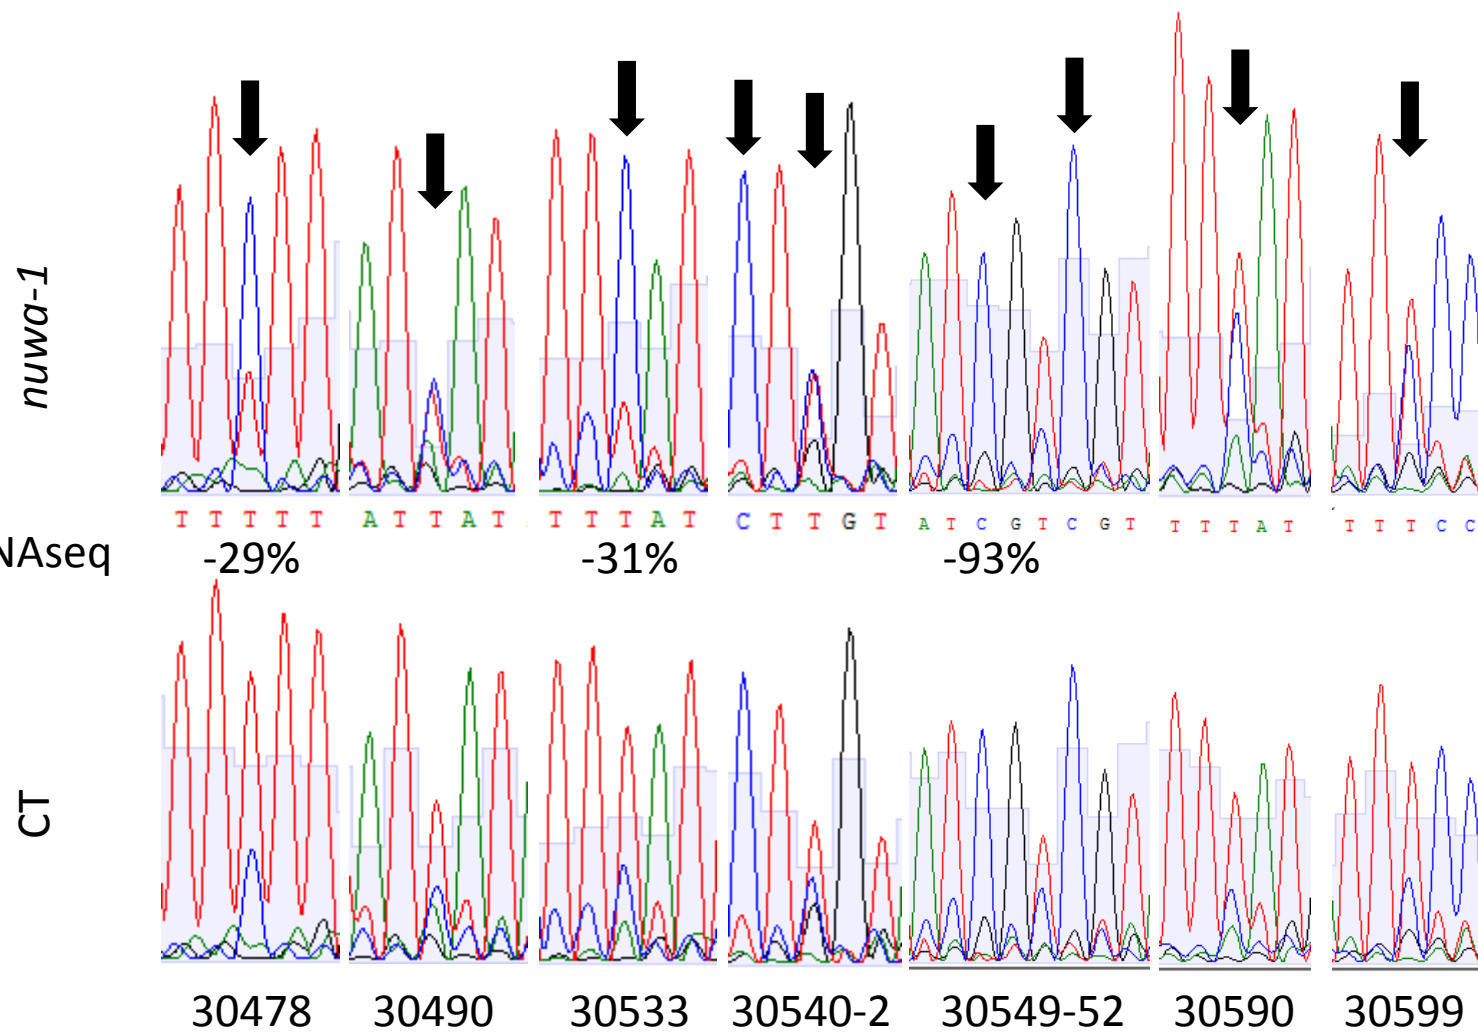

Mitochondria: *cmbB*

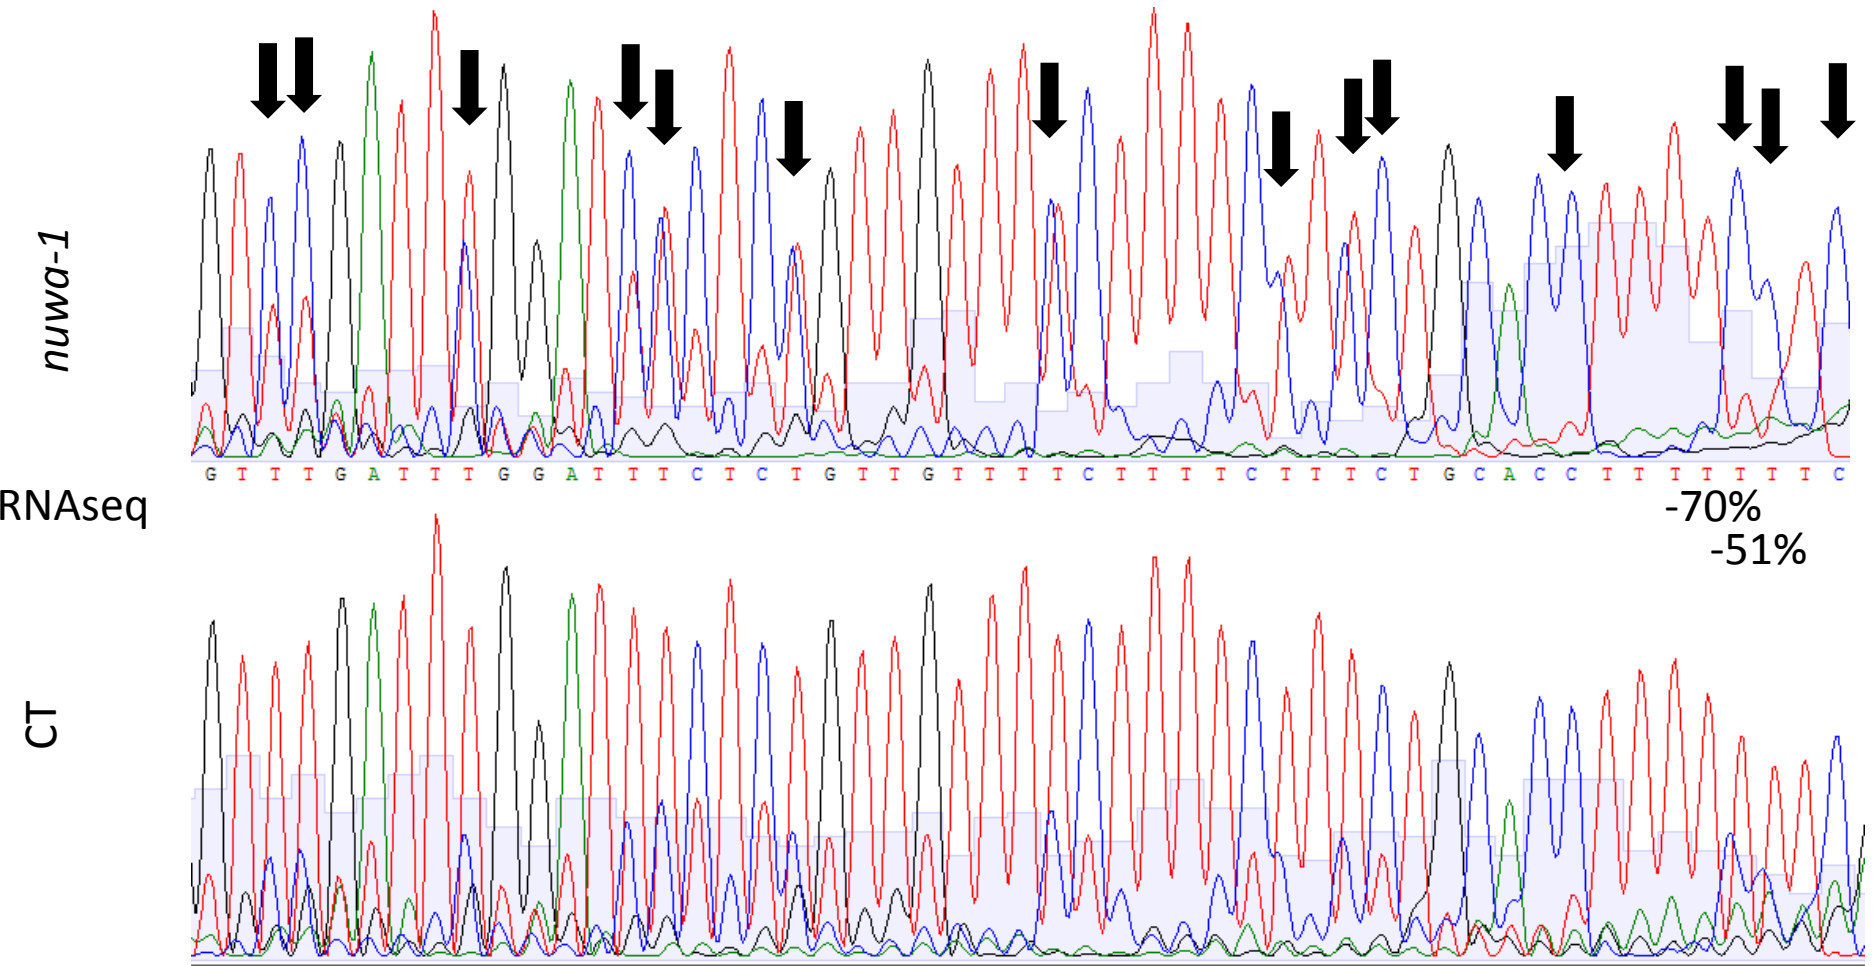

From 30610 to 30658



Mitochondria: *atp4*

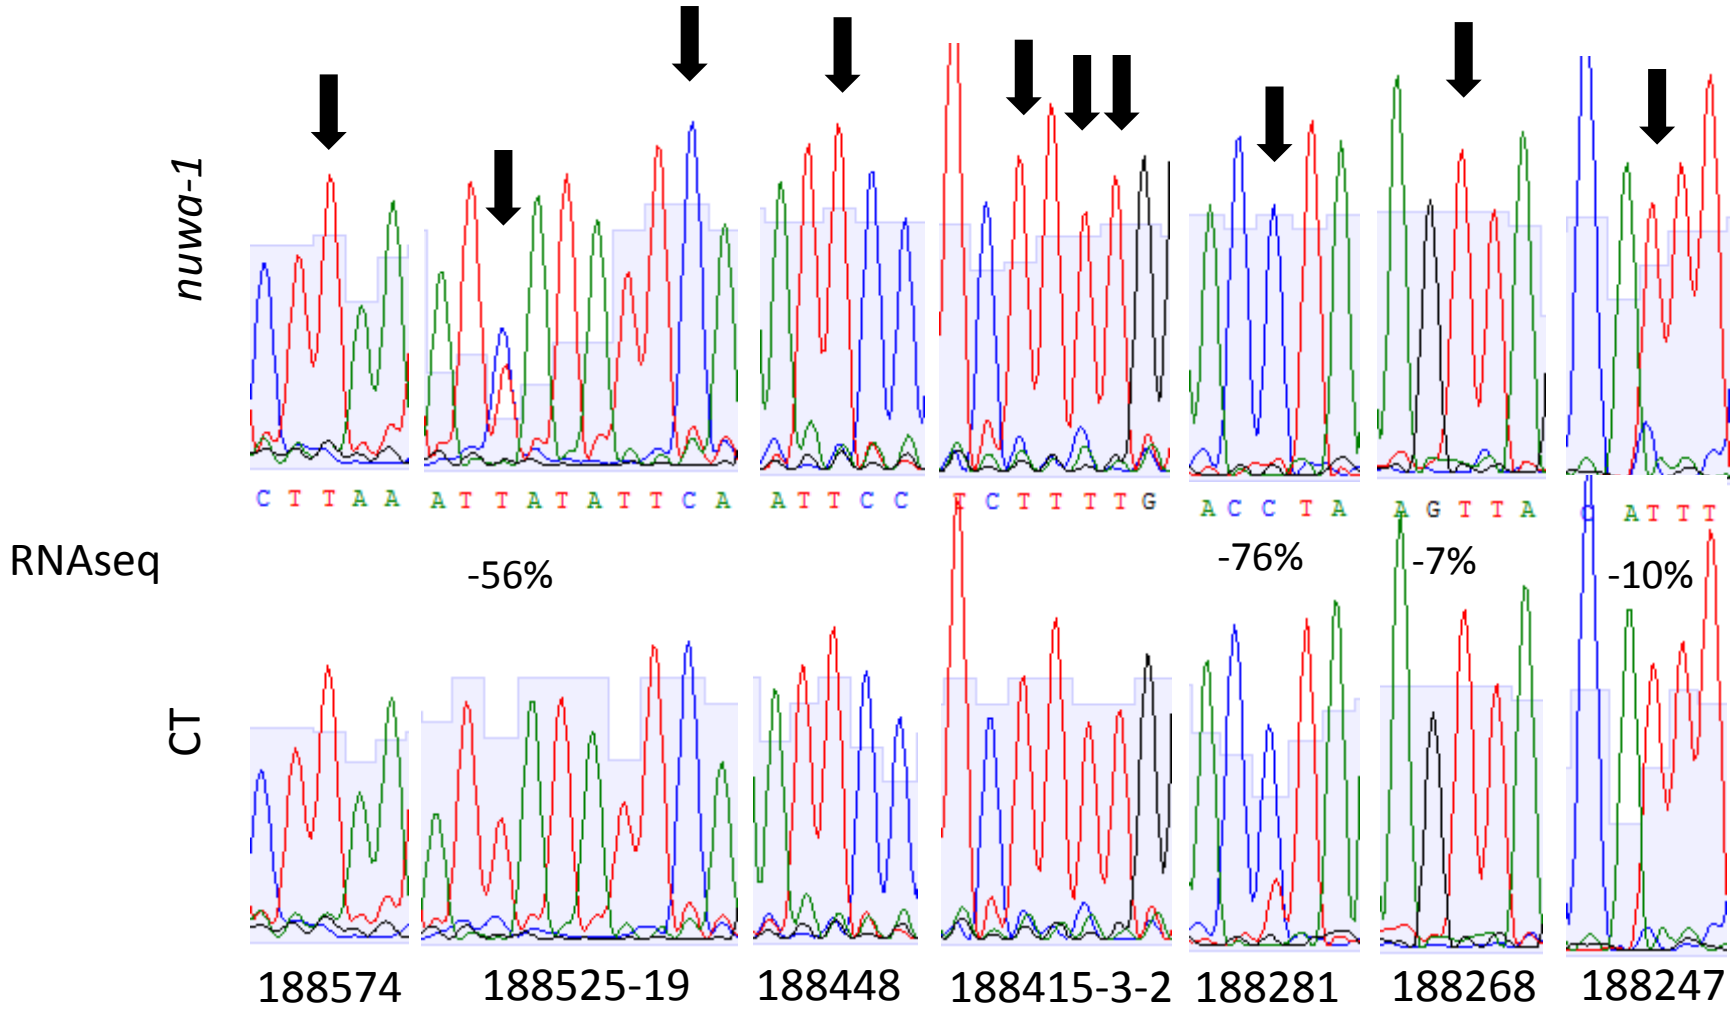

Mitochondria: *nad4*

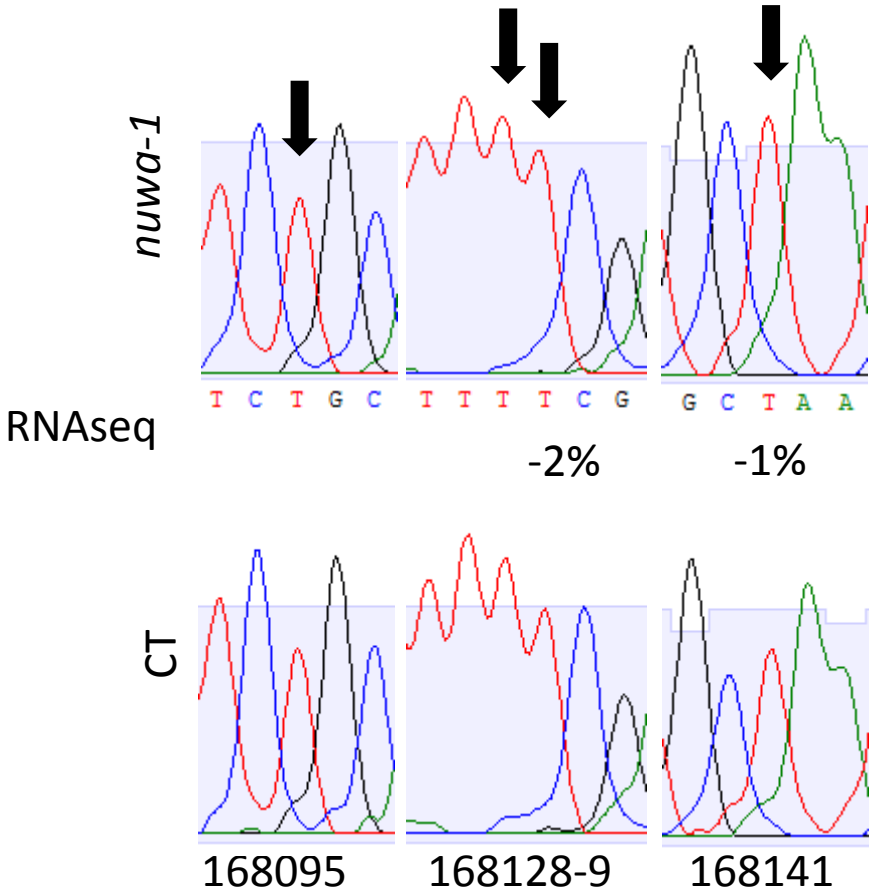

Mitochondria: *nad5*

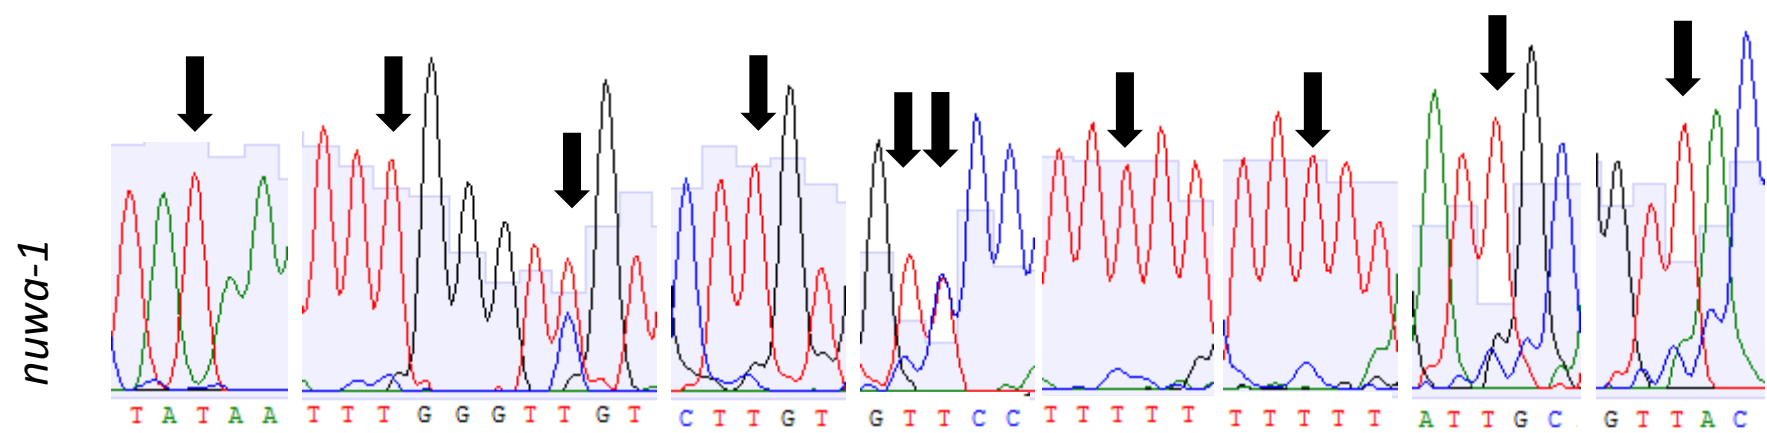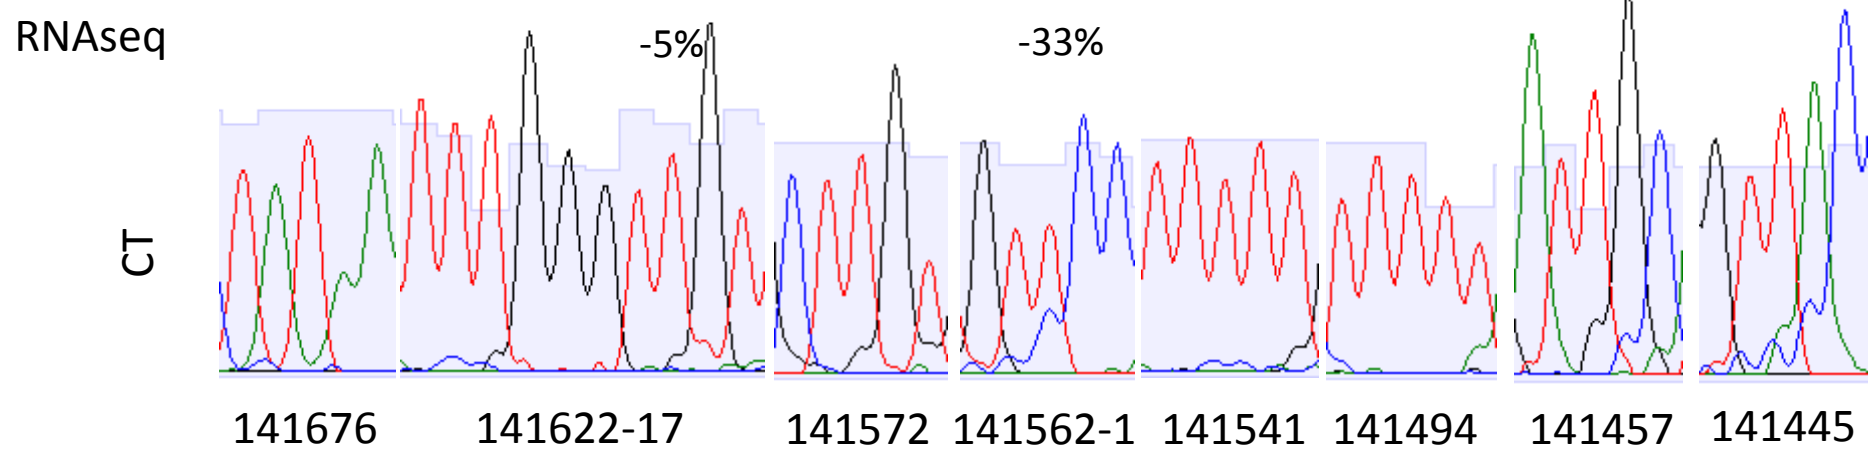

Mitochondria: *nad5*

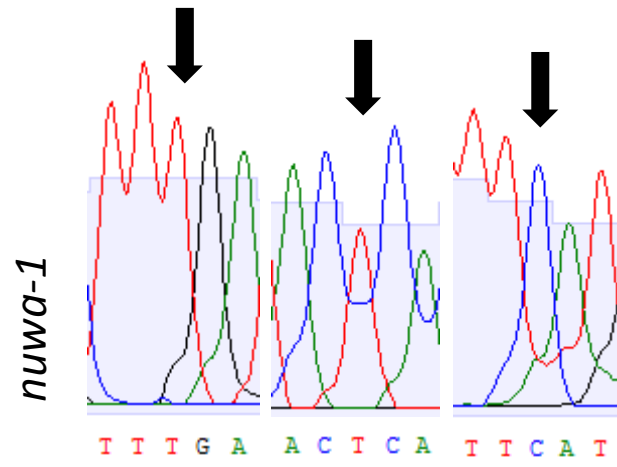

RNAseq

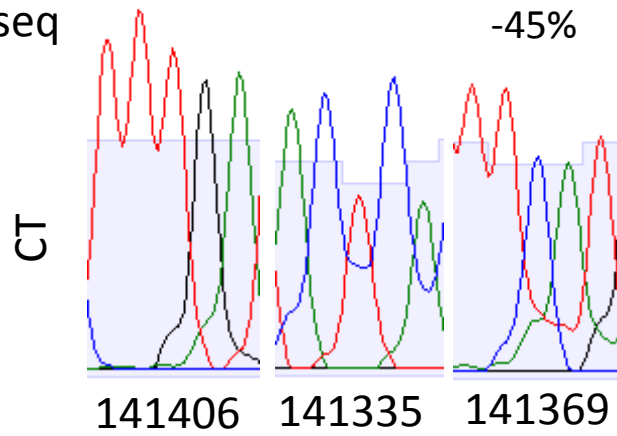

Mitochondria: *rps4*

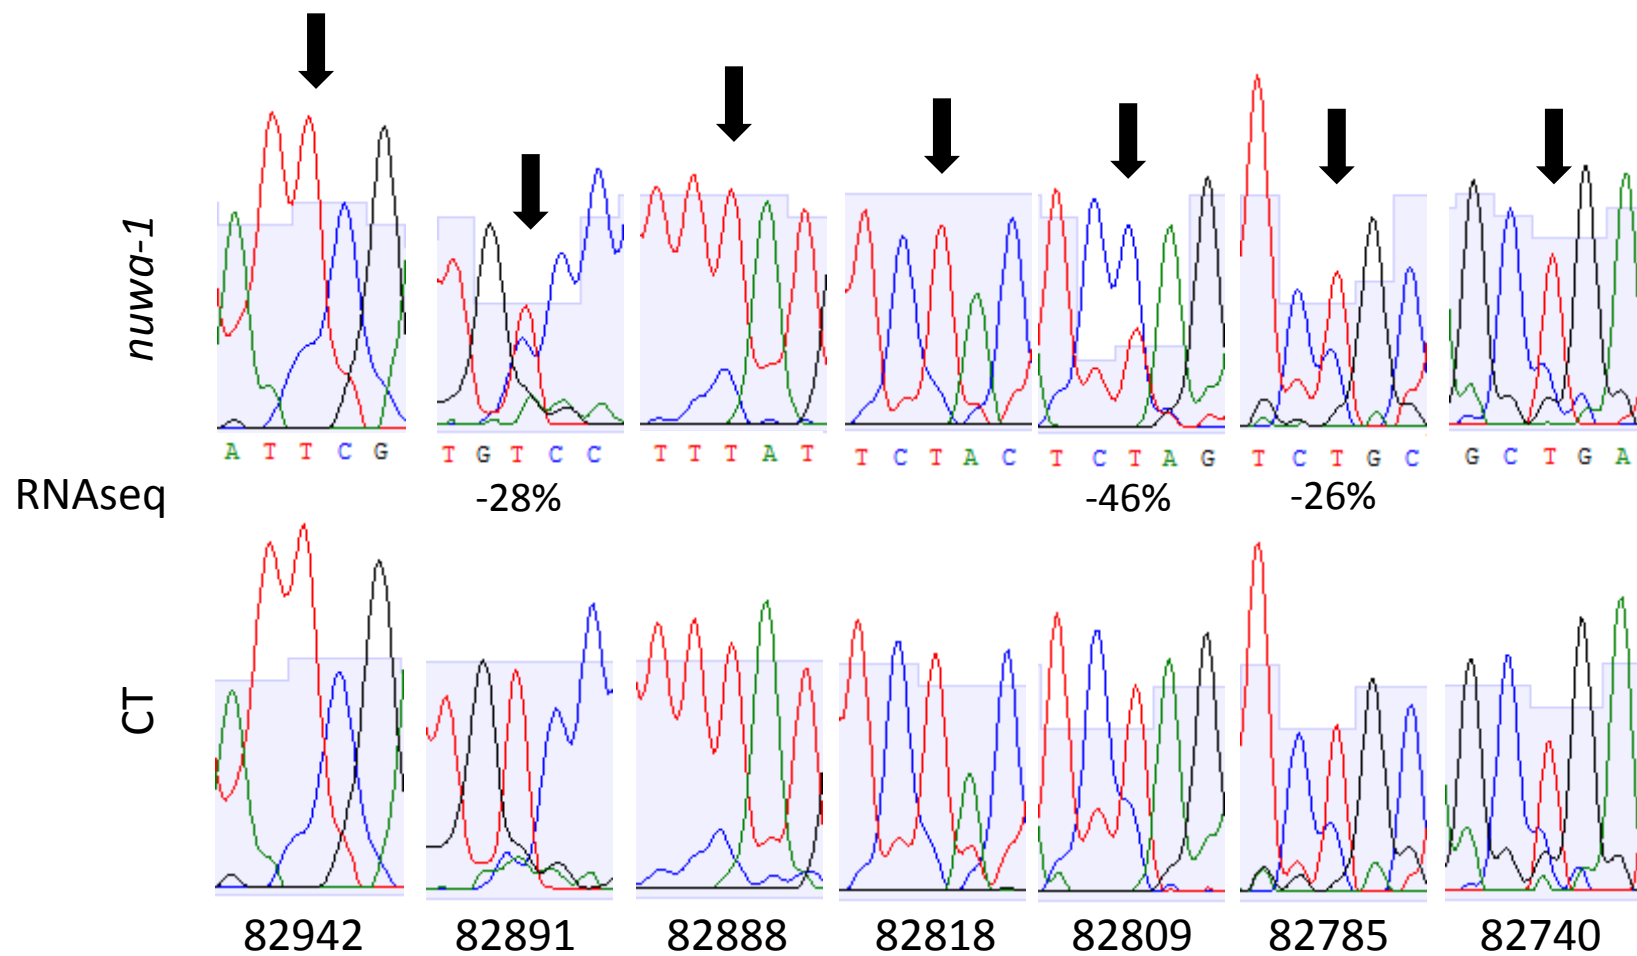

Mitochondria: *rps3*

Mitochondria: *cox2*

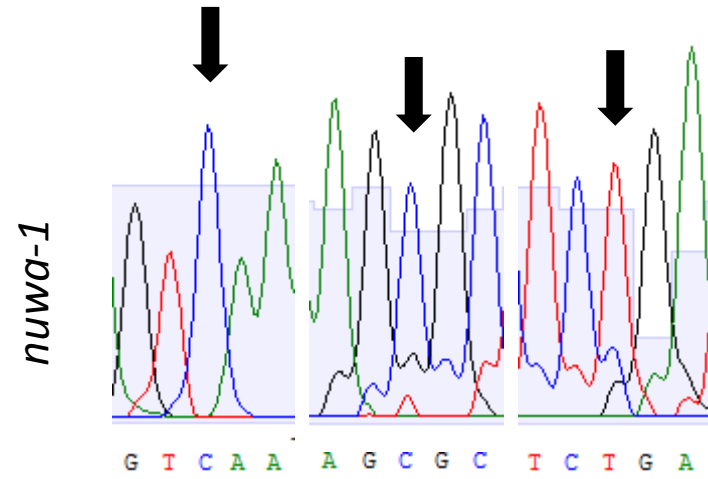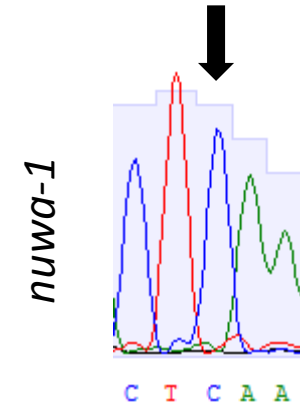

RNAseq

RNAseq

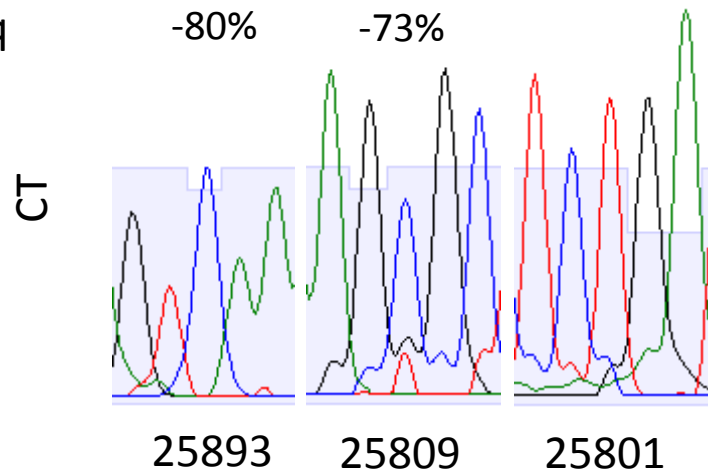

CT

-93%

42795
